# Supplementary material for: Palmitoylated mNeonGreen Protein as a Tool for Visualization and Uptake Studies of Extracellular Vesicles
Source: MDPI journal article supplement (doi:10.3390/membranes10120373), 2020-11-27
Supplement: s1 [file s1]

A

CLUSTAL O(1.2.4) multiple sequence alignment

|            |          |          |           |           |         |          |         |        |         |           |        |      |
|------------|----------|----------|-----------|-----------|---------|----------|---------|--------|---------|-----------|--------|------|
| mNeonGreen | MVSKGEE  | DNMASL   | PATHELHIF | GSINGV    | DFDMVG  | QGTGNP   | NDGYEEL | NLKSTK | GD      | LQFSP     | 60     |      |
| EGFP       | MVSKGEE  | LFTGVVP  | IL--VELD  | GDVNGH    | KFSVSG  | EGEGDATY | GKLT    | LKFICT | TTGKL   | PVPW      | 58     |      |
|            | *****    | .        | :*        | ::        | *:*     | *:       | *       | .      | *       | *::       | .*.*.* |      |
| mNeonGreen | WILVPHIG | YGFHQYLP | YPDGM     | SFPQAA    | -MVDGS  | GYQVHRT  | MQFED   | GASLTV | NYRYTY  | EGS       | 119    |      |
| EGFP       | PTLVTTLT | YGVCFSR  | YPDHMK    | QHDFFK    | SAMPEGY | VQERTIF  | FKDDG   | NYKTRA | EVKFEG  | D         | 118    |      |
|            | **       | :        | **::      | :         | ***     | *        | .       | :      | .       | **        | .*::   |      |
| mNeonGreen | HIKG     | EAQVKGT  | GFPA      | DGPVMTNSL | TAADW   | CRSKKTY  | PN---   | DKT    | IIST    | FKWSYTTGN | CK     | 175  |
| EGFP       | TLVNRIEL | KGIDFKE  | DGNILGH   | KLEYNYNSH | --NV    | YIMADKQ  | KNGIKAN | FKIRHN | IEDCG   |           |        | 176  |
|            | :        | ..       | ::**      | .         | *       | **       | ::      | ::*    | .       | :         | *      | ::** |
| mNeonGreen | RYRSTART | TYTFAKP  | MAAN      | -YLNQPMY  | VFRKTEL | ----     | KHSKTEL | NFKEWQ | KAFTD   | VMG       |        | 230  |
| EGFP       | V--QLADH | YQQNTPI  | GDGPVLL   | PDNHYL    | STQSALS | KDPNEK   | RDHMVLL | EFVTA  | AAGITLG |           |        | 233  |
|            |          | *        | .         | *:        | .       | *        | :       | *      | :       | :         | *      | .*   |
| mNeonGreen | MDELYK   |          |           |           |         |          |         |        |         |           |        | 236  |
| EGFP       | MDELYK   |          |           |           |         |          |         |        |         |           |        | 239  |
|            | *****    |          |           |           |         |          |         |        |         |           |        |      |

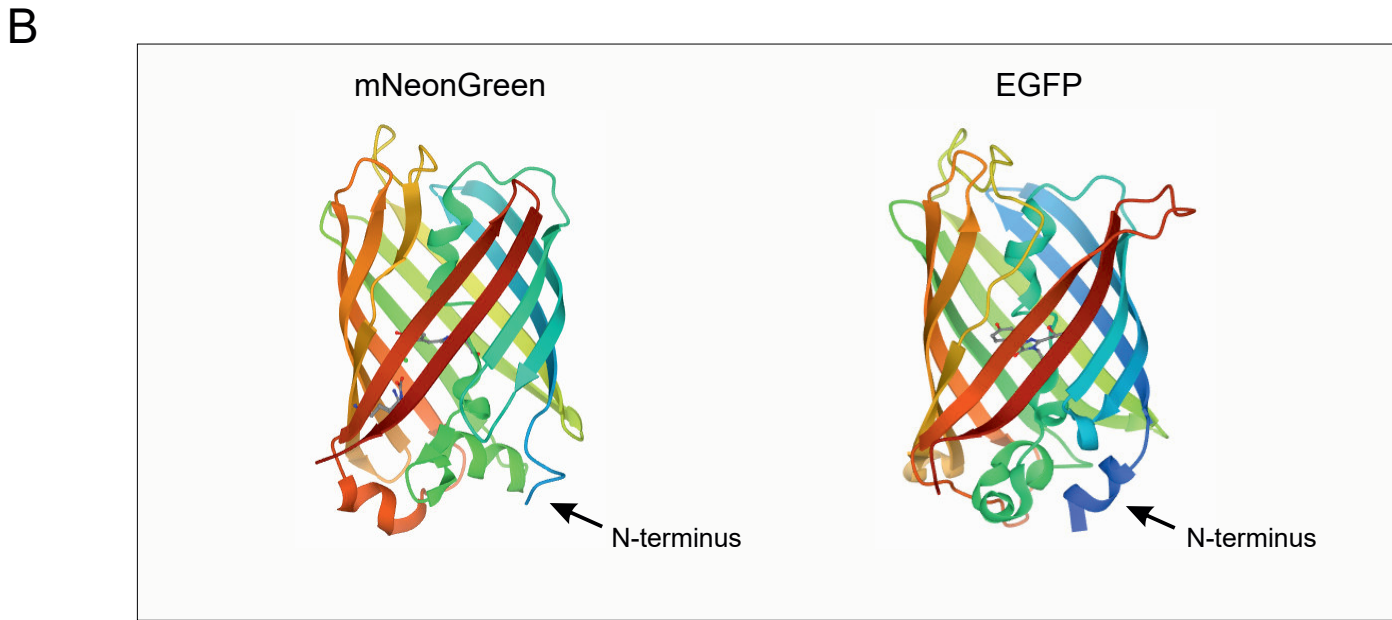

C

|                      |                         | palmNeonGreen                             | palmGFP                                                                                           |
|----------------------|-------------------------|-------------------------------------------|---------------------------------------------------------------------------------------------------|
| Construct            | Promoter                | CMV                                       |                                                                                                   |
|                      | Vector                  | CSCGW2 lentivirus                         | pLNCX retrovirus                                                                                  |
| EVs characterisation | EVs purification method | Size exclusion chromatography             | Sucrose gradient centrifugation                                                                   |
|                      | EVs size                | 40 to 240 nm; mean 118.6 $\pm$ 1.4 nm     | Various (not provided in details); EVs detected in 0.22 $\mu$ m and 0.8 $\mu$ m - filtered sample |
|                      | EVs markers             | Alix, Flotillin-2, CD9, CD63, DR $\alpha$ | Alix                                                                                              |
| EVs uptake           | EVs donor cells         | MelJuSo                                   | HEK 293T; primary glioblastoma cells                                                              |
|                      | EV recipient cells      | Huh7                                      | HEK 293T; primary glioblastoma cells                                                              |
| Fluorescent reporter | Organism                | <i>Aequorea Victoria</i>                  | <i>Branchiostoma lanceolatum</i>                                                                  |
|                      | Excitation              | 506 nm                                    | 488 nm                                                                                            |
|                      | Emission                | 517 nm                                    | 509 nm                                                                                            |
|                      | Brightness              | 92.8                                      | 33.54                                                                                             |
|                      | Maturation              | 25 minutes                                | 10 minutes                                                                                        |
|                      | Sequence identity       | 20-25%                                    |                                                                                                   |

**Supplementary Figure S2. Comparison of mNeonGreen and EGFP reporters.** A. Amino acid sequence alignment of mNeonGreen (GenBank accession number AGG56535.1) and EGFP (Addgene expression vector 14757). B. X-ray structure of mNeonGreen (RCSB PDB accession number 5LTR) and EGFP (RCSB PDB accession number 2YGD). C. The properties of mNeonGreen and EGFP and the comparison of methodological details between this study using palmNG and the report by Lai *et al.* [20] using palmGFP.
